# Supplementary material
Source: publisher figshare collection journal article supplement (https://acs.figshare.com/ndownloader/files/20168447)
Supplement: Supplementary file 1 [file 20168447]

## Sheet: Identifed GUS Proteins
GUS identified protein groups
*Listed sequences are representative sequences from each protein group
*Protein groups are organized by sequence similarity.
Protein Group #	Female 1 (LFQ intensity)	Female 2 (LFQ intensity)	Male 1 (LFQ intensity)	Male 2 (LFQ intensity)	Sequence	Loop class	Phylum	Family	Genus	Species		% Sequence Identity E. eligens GUS (UniProt ID: C4Z6Z2)
1	0	0	0	91019000	MRIFKHIHKPVCWTIATIIIFSILAPSSLYAQREIQTINDSWKFRKGECTAALDSTFKDDEWEDIHLPHTWNTDAYTEKDYYRGTGWYRRQIILPQDWIGKQVFLKLDAASKATCIYINGKKVGEHTGGYTASTLNITPFLSFNSPNMLVIRVDNARMDIPPISGDFTFFGGIYRDAWLIAVPSQHFNLTNHGSDGIFITTPRVSEQQATLSIHGEIKNDAREKAALELVHSIYHPDGTLLQTQKQFIQFKAGETRNFDSNISPILQPLLWTPETPYLYRVETTLFNCKTKSIVDQSNHHTGFRWFHFESNKGFYLNGKPYKLRGICRHQDQKPIGVALTDEMHRRDMKLMKEMGANFIRISHYPQDDAIIEMCDKLGMLAWEEIPVIDIVPDTPGYGD…	Loop 2	Bacteroidetes	Bacteroidaceae	Bacteroides	Bacteroides uniformis
2	2350600000	1643900	0	2492900	MEAKKEKKYMSDIHLEDYTEQYETGFATVDTMIFEGGRREELLNGGWHYAVDQYDTCLRQKWYKERYRDEKGFTVPIDYSFDEWPVMQLPCSWNTIDPMYLLYEGSMVFTRKFSYIAEREETVFLKVGAANYLCRVFLNGKYVGMHRGGSTPAFWNITEYLKAENRIVLAVDGTRRPEQVPTENTDWFNYCGVYRDIALIRVPKCHIKTFKIALVPDGTFGHVMAKVTLSEKITAKAELVIEELGVSRKIQLENGAGEVVFDAKPELWTPEKPKLYDVKVTCGTDTVSDRVGFREIRVNGRDILLNGEPVFLRGISCHEDSVENGKGLTREERIENIRIAKELGCNFMRLAHYPHNEEMAKLADELGLLLWEEIPVYWAIRFEREKTYEDAQNQLRELI…	No loop	Firmicutes	Lachnospiraceae	Fusicatenibacter	Fusicatenibacter saccharivorans
3	465370000	170220000	620980000	316150000	MARGSAVAWAALGPLLWGCALGLQGGMLYPQESPSRECKELDGLWSFRADFSDNRRRGFEEQWYRRPLWESGPTVDMPVPSSFNDISQDWRLRHFVGWVWYEREVILPERWTQDLRTRVVLRIGSAHSYAIVWVNGVDTLEHEGGYLPFEADISNLVQVGPLPSRLRITIAINNTLTPTTLPPGTIQYLTDTSKYPKGYFVQNTYFDFFNYAGLQRSVLLYTTPTTYIDDITVTTSVEQDSGLVNYQISVKGSNLFKLEVRLLDAENKVVANGTGTQGQLKVPGVSLWWPYLMHERPAYLYSLEVQLTAQTSLGPVSDFYTLPVGIRTVAVTKSQFLINGKPFYFHGVNKHEDADIRGKGFDWPLLVKDFNLLRWLGANAFRTSHYPYAEEVMQMCDRY…	No loop	Chordata	Hominidae	Homo	Homo sapiens
4	0	789840	0	0	MLYPILTKTRSIYDLNGLWNFKLGSHDPKKLLSSSEVMMVPTSFNDVVVDEEKRNYIGDFWYERFIELPPIGENQEAVLRFGSVTHHAKIYVNGEFLGEHSGGFTPFEVIIPEKLLSEDRIKVSICANNELNYKTLPVGNYSEEVREDGSVKKKVQENFDFFNYAGIHRPIKLIVRPKIHISDLVITSQLSDDLKSAIVNVDVTSSQEVDDINITIFDEEHKEVAILENGSTTLHNVRLWEVLDAYLYTVHVELIKDEEVVDTYDEPFGVRSIRVADGQFLINEKPFYFKGFGKHEDTFINGRGLNEAANLLDLNLLKEIGANSFRTSHYPYSEEMMRLADRLGVVVIDEVPAVGLFQNFNASLDLSPKDNGTWNVMKTKEAHEQVIAELVKRDKNHPS…	Loop 1	Firmicutes	Streptococcaceae	Streptococcus
5	0	3164100000	8253700	378030000	MLYPILTQSRLLSDLSGVWDFKLDNGKGFDEKWYEAPLKDADTMPVPASYNDLKEGVDFRDHYGWVFYQRNISVPAYVKSQRIVLRCAAVTHFAKIYLNGKLICEHKGGFLPFEVELNDVLEDGDNLLTIAVNNVIDYSTLPVGGKANMMSGLMGGVGQSDSGKPQNNPNFDFFNYCGITRPVKIYTTPKTYIHDITVTSDIDFGKAVPSATLHYEVDIEGADKDNTACKVEVFDAEGKKVAEADGISGEIKLDTVRLWQPLNAYLYRIKVTAGEDVYTLPYGVRSVRVDGIRFLINEKPFYFKGYGKHEDTFPNGRGINLPMNTKDIAIMKWQHANSFRTSHYPYSEEMMRQCDEEGIVVIDETTAVGVNLKFGGGANFGGERISTFDKEHGVQTQEH…	Loop 1	Firmicutes	Eubacteriaceae	Eubacterium			0.93
6	0	0	1221600000	0	MLYPILTESRLLSDLSGVWDFKLDNGKGFDEKWYEAPLKDADTMPVPASYNDLKEGADFRDHYGWVFYQRNISVPSYVKSQRIVLRCAAVTHYAKIYLNGNLICEHKGGFLPFEVELNDVLEDGDNLLTIAVNNVIDYTTLPVGGKANMMSGMMGGMGSGASEKPQNNPNFDFFNYCGITRPVKIYTTPKTYINDITVTSDIDFGKEAPSAVLNYDVDIEGVDKDSTACKIEVIDAEGNKVAEAAGTQGKIELENVKLWQPLNSYLYQIKVTAGEDVYTLPYGVRSVRVDGVKFLINEKPFYFKGYGKHEDTFPNGRGINLPMNTKDISIMKWQHANSFRTSHYPYSEEMMRLCDEEGIVVIDETTAVGVNLQFGGGANFGGERIGTFDKEHGVQTQEH…	Loop 1	Firmicutes					0.95
7	3330400	2985200000	18219000000	460170000	LLYKILKLQEESIMLYPILTESRLLSDLSGVWDFKLDNGNGFDEKWYEAPLKDADTMPVPASYNDLKEGADFRDHYGWVFYQRNISVPSYVKSQRIVLRCAAVTHYAKIYLNGNLICEHKGGFLPFEVELNDVLEDGDNLLTIAVNNVIDYTTLPVGGKANMMSGLMGGMGAGASEKPQNNPNFDFFNYCGITRPVKIYTTPKTYINDITVTSDIDFGKETPSAVLNYAVDIEGVDKDSTACKVEVFDAEGNKVAEAAGTQGKLELENVKLWQPLNSYLYQIKVTAGEDVYTLPYGVRSVRVDGVKFLINEKPFYFKGYGKHEDTFPNGRGINLPMNTKDISIMKWQHANSFRTSHYPYSEEMMRLCDEEGIVVIDETTAVGVNLQFGGGANFGGERIG…	Loop 1	Firmicutes					0.93
8	0	0	2166200	0	MLYPVLTSSRLLSDLSGVWDFKLDYGKGFEEEWFQKPLENPMTMPVPAAYNDLKEGIDFRDHYGWVFYQRTFSVPEFMKAQRVMLRFDAVAHGAKVYVNGDLLCAHEGGFLPFEVEITDLAGKGECLLTVAVNNIIDYTTLPVGGKNNILSGGLPGFETKGPQKPVNNPNFDFFNYCGIIRPVRIYTTPKSYISDITVTAEVNGADAALNYKIDTIGTGECLVEVFDREGNKVTEAAGCEGILKIEQVKLWQPLNAYLYNIRVTFGEDVYTLPYGVRTVRIDGTKFLINEKPFYFKGYGKHEDTFPNGRGINLPMNTKDISLMKWQGANSFRTSHYPYSEEMMRLCDQEGIVVIDETTAVGVNLEFGGGANFNGQKISTFDKEHGVQTQEHHKEVIRDL…	Loop 1	Firmicutes	Lachnospiraceae	Lachnoclostridium	[Clostridium] clostridioforme
9	0	0	0	1926500	MTPSRFVSDLSGIWDFAFDNGKGMEEKWYEKPLAEPLSMPVPSSYNDLTESITNREHYGWVFYQKKISVPSFVKGQRVVLRCDAVTHHARIYLNGELLATHECGFLPFEVELTEKLQPGENLLTVAVSNIIDYTTLPVGGKADMMGGMMGNAAEETEKKPVNHPNFDFFNYAGINRPIRIYTTPKDYISDISVVSEVHGNNAELIYEVETKGEGVCLVEAFDREGRKVAECSGTKGVLKIENVHLWQPLKAYLYEIKVTFGEDVYTLPYGVRTVRVDGTRFLINEKPFYFKGYGKHEDTFPAGRGLNLPMNVKDISLMKWQGANSFRTSHYPYSEEMMRLCDEEGIVVIDETTAVGVNLQFGGGANFHGKKISTFDPEYGVQTQEHHKEVVRDLIARDK…	Loop 1
10	0	16654000	0	0	MYMYPQSNSARSVRDLSGVWDFRFNVDEPWQPIAVPASYNDQSPDPEFRRHYGMAYYRTTFTVPEGARRVLRFDAVTHNAVVRLNGQEIASHRGGFLPFEADITALAQPGETVTLDVEVDNRIGHSSLPVGNEGGTAFFGSDNAGIPAVEAGKARQQAQGINLPNFDFFNYAGITRPVHLYTTPAAYIRDVTVAADMTGTLRYTVDTVGEGSVKVEILDAEDRVVACADGAAGTVQVENARLWQPRPGTPYLYTALVRFGKDEYRQKFGFRSVEVSGHKFLINGAPFYFKGPCKHEDSAFRGRGYDACVTVTDLKLYEWLNANCLRMSHYPYAEEVYDLCDRLGIVVIDETPAVGIGAGAACDPYQTFPLKTYHSAVLRAMIERDKNHPCVVLWSLGNE…	Mini-Loop 1	Firmicutes	Ruminococcaceae	Subdoligranulum
11	0	0	0	21713000	MLYPQQNPSRLKLSLNGTWNFQLGSEDAAQFDPAQPLPDPQPIAVPASYNDQNDQTTALRRHYGWAWYQRTVTLPAFCTGQRIVLRFGAVTHTANVWLNGQLVAEHKGGFTPFEADVTALLAPGQTALLTVACDNRVDHSTLPVGNEAGQLAFFGSDNAGIPSVEAAKRIAAPQNRPNFDFFNYAGIHRPVWLCTTPADHIEDVTVVPHTDGTVHYAVQTTGGVPVSVRVLDAAGAAVASAEGAKGTLHIPDVHLWEPKPGVPYLYTLHITCGADQYDQTFGVRSIEVKGTQVLLNGRPLYFKGFCKHEDFTAHGRGFDPVLNIKDVNLLHWANANAVRTSHYPYAEEFYDLCDREGILVMDETPAVGIGGGTAVNPYKEYPLAEHHRQVLTEMIQRDK…	Mini-Loop 1	Firmicutes	Ruminococcaceae	Faecalibacterium	Faecalibacterium prausnitzii
12	0	124530000	0	71079000	MLYPEQNEARLKLSLDGTWAFALGSCAETQFDPAKPLPDAQPIAVPASYNDQNDQTTALRRHYGWVWYQRKVTLPAFCAGQRVVLRFGSVTHTAKVWLNGQLIAQHKGGFTPFEADVTALLQPGETALLTVACDNRVNHSTLPVGNEDGQLAFFGSDNAGIPSVEAAKRAAAPQNRPNFDFFNYAGIHRPVVLYTTPKEYIEDVTIVPAVDGTVQYAVKTTGSAPVRVTVLDADGNAVASAESAEGTITIPEVHLWEPRPGTPYLYTLHATCGADVYDQTFGVRSIEVRGTQVLLNGKPLYFKGFCKHEDFTAHGRGFDPVLNVKDVNLIYWANANAVRTSHYPYAEEFYDLCDREGILVMDETPAVGIGGGAAVNPYKEYPLAEHHRQVLAEMIHRDK…	Mini-Loop 1	Firmicutes	Ruminococcaceae	Faecalibacterium	Faecalibacterium prausnitzii
13	0	0	0	14277000	MRIEENVMLYPEQNEARLKLSLDGTWAFALGSCEENQFDPAKPLPDAQPIAVPASYNDQNDQTTALRRHYGWAWYQRKVTLPAFCAGQRVVLRFGSVTHTAKVWLNGQLIAQHKGGFTPFEADVTALLRPGETVLLTVACDNRVNHGTLPVGNEEGQLAFFGSDNAGIPSVEAAKRAAAPQNRPNFDFFNYAGIHRPVVLYTTPKEYIEDMTVVPAVDGTVQYAVKTTGSAPVHVTVLNADGSAVAQAEGAAGTLTIPEVHLWEPKLGTPYLYTLHATCGADVYDQTFGVRSIEARGTQVLLNGKPLYFKGFCKHEDFTAHGRGFDPVLNVKDVNLIHWANANAVRTSHYPYAEEFYDLCDWEGILVMDETPAVGIGGGAAVNPYKEYPLAEHHRQVLA…	Mini-Loop 1
14	0	0	75731000	0	MLYPQENKIRGIIDLNGVWDFALGTTEEPGDAVTLPEQMEPIAVPASYNDQKDDIVYRNHYGYAYYRRNITVPSYYKGQRLVLRFDAVTHFAKIYLNGVLLTQHKGGFLPFEVDITDKLCAGESAELVVAVDNRINHSTLPVGNEEGTSFMGADNAGVPGVEAAKRWRKPQNLPNFDFFNYAGINRPVRIYTTPQAYIKDVTLVTDIRENDGVVTYQVETSGADGQEVTLQILDADGNEVTQAKGASGEIVIPDAKLWEPYPGTPYLYTAAVTFGDDYYEELFGVRTVCVEGTSFLINGKPFYFKGFGKHEDSAFHGRGMDVCLDVKDVNLIHWLHANSFRTSHYPYAEEMYRLCDREGIVIIDEVPAVGIGAGAGINPYETFPIREHHEQVIKDMIAR…	Mini-Loop 1	Firmicutes	Lachnospiraceae	Roseburia	Roseburia intestinalis
15	27918000	1161700000	305870000	0	MLYPQENKIRGIIDLNGVWDFALGTTEKPGDAVTLPEQMEPIAVPASYNDQKDDIAYRNHYGYAYYRRNITVPSYYKGQRLVLRFDAVTHFAKIYLNGVLLTQHKGGFLPFEVDITDKLCAGESAELVVAVDNRINHSTLPVGNEEGTSFMGADNAGVPGVEAAKRWRKPQNLPNFDFFNYAGINRPVRIYTTPKAYIKDVTLVTDIRGTDGIVNYQVKTSDTDGQEVVLQILDANGNEVAQAKGTSGEIVIPDAKLWEPYPGTPYLYTAAVTFGDDYYEEPFGVRTVRVEGTSFLINGKPFYFKGFGKHEDSAFHGRGMDVCLDVKDVNLIHWLHANSFRTSHYPYAEEMYRLCDREGIVIIDEVPAVGIGAGAGINPYETFPIREHHEQVIKDMIAR…	Mini-Loop 1	Firmicutes	Lachnospiraceae	Roseburia	Roseburia intestinalis
16	0	41775000	0	0	MLYPQENKIRGIIDLNGVWDFALGTTEEPKDTVTLPDQMEPIAVPASYNDQKDDIAYRNHYGYAYYRRNITVPSYYKGQRLVLRFDAVTHFAKIYLNGVLLTQHKGGFLPFEVDITDKLCAGESAELVVAVDNRINHSTLPVGNEEGTSFMGADNAGVPGVEAAKRWRKPQNLPNFDFFNYAGINRPVRIYTTPKAYIKDVTLVTDIRGTDGIVNYQVKTSDTDGQEVVLQILDANGNEVAQAKGTSGEIVIPDAKLWEPYPGTPYLYTAAVTFGDDYYEEPFGVRTVRVEGTSFLINGKPFYFKGFGKHEDSAFHGRGMDVCLDVKDVNLIHWLHANSFRTSHYPYAEEMYRLCDREGIVIIDEVPAVGIGAGAGINPYETFPIREHHEQVIKDMIAR…	Mini-Loop 1	Firmicutes	Lachnospiraceae	Roseburia	Roseburia intestinalis
17	0	14144000	0	105240000	MLYPKMNRARTVMDLSGLWEFKLGDYETPGDNCERLAGGERIAVPASYNDQKDDPAYKNHYGWAWYEREVTVPAFFKGQRLFLRFDAVTHRARIYINGTFVMEHKGGFLPFELELTELVVPGETLLLTVAADNRISHSTLPVGNEGGTAFFGSDNPGVPSVEAAKVWRKQGNLPNFDFFNYAGINRPVRLYTTPVSRICGLTLIPDIDDTDGILQYEAETEGEGAVHVEIFDVEGNKVAEAEGASGTITIPDARLWWPWPGTPYLYRAVFTFGEDIYEETFGIRTVKVEGTQFLINGKPFYFKGFGKHEDSPFHGRGLDLCLDVKDVNLIHWLHANSFRTSHYPYAEEMYQLCDRGGIVIIDETPAVGIGAGEHCDPYQTFPIREHHEAVLRDMIERDK…	Mini-Loop 1
18	0	0	0	11531000	MLYPRENEVRAVLDLSGIWKFQLGDARDPGEACESLKDSEVISVPASYNDQKEDPAYRNHYGWVYYERTIAVPASLKGQRLVLRFDAVTHRAKVYINGKLAAEHKGGFLPFEVEITDLIPAGTRGVLTVAADNRIHHGTLPVGNEGAIAFFGSDNPGVPSVEAAKLWAKPQNIPNFDFFNYAGINRPVRLYTTPEMYVDDITLVPSIDGADGIVEYDISVKGRAGEQKAVLSEMTAIEILDENRSCVARGCGCAGKLRIPQAKLWWPWPGIPYLYTARISCGEDVYEQPFGIRTVRVEGTKFLINEKPFYFKGFGKHEDSAFHGRGLDLCLDVKDVNLIHWLHANSFRTSHYPYAEEMYDLCDREGIVIIDETPAVGIGAGEAQNPYETFPIREHHEQV…	Mini-Loop 1
19	0	30442000	0	0	MEILLNDSWSFHKENEASEQVRIPHTYNSVDGQSGTSMWRGRGFYTRKLMLTEADLNQSLFLEIGAAAMVSTVYINGQKVYENTCPYALYRMSINEYVNEGENQIEIVTDNSANDAVYPQMADFSFYGGLYRDVKVIAAPKIHFDYLDGSRDGVQIRTVKEENGSCWKVVGTGSVVCEKEKSKGKVRMLLLNQGEVVCETSASMEFSGKDTFSLTLEISNPHLWMGTENPYLYQVKLELYEEETVVEERSISTGFRTIQITSEQGLFLNGKHVKLRGVARHQDFGGVGNAVSKENMECDMQLIKEIGANSVRLSHYQHDDYFYQRCDEEGILVWAEVPFISIISENEAAEDNIREQMRRLILQCGNHTSVYCWGVQNEITIAGENEEIHAHVKRMSEYT…	No loop	Firmicutes
20	0	0	0	7152300	MKNLRFTFSVLLAAAFSMQGLAQRENILINQDWNFRFSHQVNHSSARRVDLPHTWNAQDALSGKIDYKRGIGNYTKNIFIRPEWKGKRLFLRFEGANSVSNVFVNGKQIGEHRGGYGAFIFEITDKVNYGKNNSILVRVNNGEQLDVMPLVGDFNFYGGIYRDVHLLLTEDICISPLDYASPGIYLMQKQVTDKQADICARINLSNKTEQPQKAILKLQINEGAKTVYESEKEVTIAPRTTVQPENMEFTLSNPHLWNGTQDPFMYQAVVTLSKDGKELDKVEQPLGLRYYTTDADKGFFLNGKHLPLHGVCRHQERAEVGNALRPMHHEEDTRIMREMGVNAIRLAHYPQATYMYDLMDKNGIVTWAEIPFVGPGGYADKGFVDQPSFRENGKEQLKE…	Mini-Loop 1
21	0	0	0	207500000	MKNLRLTFAIWFAAAFSLPTFAQREDKLINQDWSFRFSHQVNANAAHRVDLPHTWNAQDALEGKQDYKRGIGNYTKKIFIRPDWKGKRLFLRFEGANCVSNVFVNGKHIGEHRGGYGAFVFEITDKVEYGKENTLLVRVNNGEQLDVMPLVGDFNFYGGIYRDVHLLLTDNLCISPLDYASSGVYLIQQQVTDKQAVVCARVNLSNGTGELRKAVVRLQINDGEKTVYETEKEVSLTPHTDVQAEDIEFILKNPRLWNGTRDPFMYQAVVTLIKDGKELDKVKQPLGLRYYTTDPDKGFFLNGKHLPLHGVCRHQERAEVGNALRPGHHEEDTRIMLDMGVNAIRLAHYPQAAYMYDLMDKNGIVTWTEIPFVGPGGYADKGFVDQPSFRENGKEQLKE…	Mini-Loop 1	Bacteroidetes	Bacteroidaceae	Bacteroides
22	0	42344000	0	0	LDYASSGVYLIQQQITDKQAAICARINLSNGTGELRKAVLRLQVNDGKKTVYETEKEVSMIPHTDVQVENIEFILKNPRLWNGTQDPFMYQTVVTLIKDGKELDKVEQPLGVRYYITDPDKGFFLNGKHLPLHGVCRHQERAEVGNALYPVHHEEDTRIMLDMGVNAVRLAHYPQATYMYDLMDKYGIVTWAEIPFVGPGGYADKGFVDQPSFRENGKEQLKEMIRQHYNHPSICFWGLFNELKEQGDNPVEYIKELNAMAHREDPTRPTTSASNQDGALNFITDHIAWNRYDGWYGATPATLATWLDATHKNHPEIKIAISEYGAGASIYHQQDSLVQTVPGSWWHPENWQTEYHIQNWKIINERPYVWASFVWNMFDFGAAHRMEGDRSGINDKGLV…	Mini-Loop 1	Bacteroidetes	Bacteroidaceae	Bacteroides
23	1547300000	2166600000	250950000	1284800000	MKNLRRTFTVLFAAAFSMQVLAQREDKLINQDWSFRFSHQVNASAARRVDLPHTWNAQDALSGKHDYKRGIGNYTKKIFIRPEWQGKRLFLRFEGANCVSNVFVNGKHIGEHRGGYGAFVFEITDKVEYGKENALLVRVNNGEQLDVMPLVGDFNFYGGIYRDVHLLLTDNLCISPLDYASSGVYLIQQQVTDKQATICARVNLSNGTGELRKVVLRLQVNDGKKTVYETEKEVSMIPHTDVQVEDIGFILKNPRLWNGMQDPFMYQAVLTLIKDGKELDKVEQPLGLRYYVTDPDKGFFLNGKHLPLHGVCRHQEKAEVGNALCPVHHEEDTRIMLDMGVNAVRLAHYPQATYMYDLMDKHGIVTWAEIPFVGPGGYADKGFVDQPSFRENGKEQLKE…	Mini-Loop 1	Bacteroidetes	Bacteroidaceae	Bacteroides	Bacteroides vulgatus
24	0	0	0	37159000	MKQQKCNYFPSLWWRGREKGLSTFLFLLLFSISLHAQRQDILLNNNWNFRFSHQVQGDTRRVDLPHTWNAQDALAGKIDYKRGIGNYEKALYIRPEWKGKRLFLRFDGVNSIADVFINRKHIGEHRGGYGAFIFEITDLVKYGEKNSVLVRANNGEQLDIMPLVGDFNFYGGIYRDVHLLITDETCISPLDYASPGVYLVQEVVSPQEAKVCAKVNLSNRTADGTAELQVLVTDGTKVICKESRNVSLKQGADIQEQLPLLIQKPRLWNGCEDPFMYQVSISLHKDGKQIDSVTQPLGLRYYHTDPDKGFFLNGKHLPLHGVCRHQDRAEVGNALRPQHHEEDVALMREMGVNAIRLAHYPQATYMYDLMDKHGIVTWAEIPFVGPGGYADKGFVDQAS…	Mini-Loop 1	Bacteroidetes	Bacteroidaceae	Bacteroides	Bacteroides fragilis
25	132190000	90618000	0	67422000	MRTPIMSCCRLMAVALFLFCSMPLFAQRQDILLNDNWKFRFSHQVQKGSEIRVDLPHTWNTQDALSGKIDYKRGIGNYEKKLFIRPEWQGKRLFLRFEGANSIADVFINRRHIGEHRGGYGAFVFEITGEVNYGKENSILVRVNNGEQLDVMPLVGDFNFYGGIYRDVHLLITDEACISPLNYASPGVRLIQDSVSHQYAKIRAVVDLANGNNAGQEVELGVRLLDGQKVVAQQKQTLTLAGNAALQQELTFEINNPHLWNGRQDPFLYQAEVSLSRGGQLVDCVTQPLGLRYYRIDPDKGFFLNGKHLPLHGVCRHQDRSEVGNALRPQHHEEDAALMLEMGVNAVRLAHYPQATYFYDLMDKNGIIVWAEIPFIGPGGYDDKGFVNLPSFRANGKEQ…	Mini-Loop 1	Bacteroidetes	Bacteroidaceae	Bacteroides	Bacteroides thetaiotaomicron
26	39448000	6792000	134860000	28044000	MKTVLLQSSRLVSVVLFMLYGMSMFAQRQDILLNNDWNFRFSHQVQKGTEVRVDLPHTWNAQDALSGKIDYKRGIGNYEKNLFIRPEWKGKRLFIRFEGVNNIADVFINRRHIGEHRGGYGAFIFEITGKVEYGKENSILVRVNNGEQLDIMPLVGDFNFYGGIYRDVHLLITDETCISPLDYASPGVRLIQDSVSHRYAKVRAIVDLSNGSSGNQEVELNVRLLDGQRVVKEGTKNVNLSGNEVMQQELTFEIDQPHLWNGRQDPFLYQAEVTLFRNGQMVDRVTQPLGLRFYRIDPDKGFFLNGKHLPLQGVCRHQDRSEVGNALRPQHHEEDVALMLEMGVNAVRLAHYPQATYFYDLMDKNGIIVWAEIPFVGPGGYNDKGFVDLPAFRANGKEQ…	Mini-Loop 1	Bacteroidetes	Bacteroidaceae	Bacteroides
27	5272700	0	5110100000	729570	MNKKEVKMATKNINASWQFTKDAITVAEGYSVLTQGNWEALDLPHTWNGKDGQDGGNDYHRGTCYYVKNMKREEFGSEPITYIEFNGANSSAWLYVNGKEAGHHDGGYSTWRVNVTDFLADENEIVVAVDNAPNDHVYPQMADFTFYGGLYRDVNVISVPETHFDLDYYGTHGIAVTPIVEGANASVEVEVFVTDATEEDTLEYVIKNGDEVIATKSVSANETKVTFEIENVHLWNGRKDPHLYTAEVTLKRNDTVLDERSTRFGCRTFVIDPEKGFILNGERYPLHGVSRHQDRPHIGNALTHKEHKEDIELILEMGANTIRLAHYQHDQYIYDLCDETGLVLWAEIPYISKHLPNGRENTISQMKELIIQNYNHPSIVVWGLSNEITMGGGEDDDLI…	No loop	Firmicutes
28	0	74847000	0	29642000	MSKTILLNQNWIFSKEGHDEPVTLPHTWNAIDGQDGGNDYYRGTCCYTTVLPDIVLPENGRAVLQFDAVAMTAEVYLNEQKLAEHKGGYSAFCVDITDALRNGSNLLRVNVDNSDNDTVYPQKADFTFYGGIYRDVTLHVVPAAHFALAENGAVPVRVTPIVTDLDARRCEVTVEAAVVGAESVSFTLDGQQTSVAVKDGTARAVFTLEHARLWDGLDDPYLYTVTARLDNGETETARFGCRKFEIDPQKGFILNGRPYPLRGVSRHQDRKGAGVAITKEMMEEDMALILEMGANTIRLAHYQHAQAFYDLCDEKGVVIWAEIPYITMHMHNGRANTLTQMEELIVQNYNHPCIAVWGLSNEITAASAVNEELLENHRALNELAHRLDPTRPTTMANVF…	No loop	Firmicutes	Ruminococcaceae	Gemmiger	Gemmiger formicilis
29	0	46324000	0	0	VLQFDGVAMTAVVSLNGEKIAEHKGGYSTFRVDITDALHDGANELTVSVDNSDNDTVYPQKADFTFYGGIYRDVTLHVVPAAHFALSENGAVPVRVTPIVTDLTEHRCEVTVEAFVVGAQSVTFTLDGQQTSVAVKDGTARAVFTLEHARLWDGLDDPYLYTVTARLDNGETETARFGCRKFEIDPQKGFILNGRDYPLRGVSRHQDRKGAGVAITKEMMEEDMALILEMGANTIRLAHYQHAQAFYDLCDEKGLVIWAEIPYITMHMHNGRANTLTQMEELIVQNYNHPCIAVWGLSNEITAASAVNEELLENHRALNDLAHKLDPTRPTTMANVFMLEITSPILEIPDVNSYNLYFGWYLGELDQNDDFFDTYHAKYPDRCIGFSEYGADANPAYQS…	No loop
30	0	16739000	0	35818000	MRNIINLNKDWKFIQKDAGLPNSLPTDWTSVDLPHTWNAVDGHDGNGSFDRGTYWYAKTFATPKQAFGGNRVFVEILAAGQQATVYVNGTEVVYHEGGYSTFRADVTDLCKEDGENLLVVACSNERKESVYPQSADFTFYGGLYRGVNIISVPDAHFDLEYYGGPGIEVTPTPCDCGGAMFDIVTYTKGIDENFTVLYSICDAEGQEVAGGCRPADDTKIKLFVPDAKKWEIDDPYLYTVTARLQRRNETFDEVNARVGVRSFSCDPEKGFIINGKETPLRGVSRHQDMLYKGNALSKEDHYHDAELIKELGANTIRLAHYQHNQYFYDACDELGFVIWAEIPFISVMNKDPEAHQNCISQMKELVIQNYNHPSICFWGISNEILIGGISEQLVENHKE…	No loop	Firmicutes	Lachnospiraceae
31	10959000	157570000	0	0	MRNVMKLKDNWMFVKEAENAADAASKKGTAVSLPHTWNAVDGQDGGNDYHRGTCWYVTKFQKPELEAGSQVYVEFLGASVIADVYLNGEAVAHHEGGYSTFRVNLTDKLQEENVLAVALNNADNNYVYPQKADFTFYGGLYRMVNLIVVPESHFELDYAGGNGIAVTPTVECDENRVPTGKASVKVETWVTGNADSVVITITGEESESKTVSVVDGHAEATFELEHVHLWDGVDDPYLYHAKAELSSGDVTETTFGCRSFYTDPEKGFVLNGRVYPLRGVSRHQDRTGAGNALSYEMHKEDMEIIKEIGANTIRLAHYQHAQEFYDLCDEYGMVVWAEIPYITMHMPNGRANTLSQMEELVVQNYNHPSIVCWGLSNEITAATPVDEDLLENHRLLNDL…	No loop	Firmicutes	Lachnospiraceae	Roseburia	Roseburia hominis
32	0	14744000	0	0	MELKDNWMFVKEAENAEDAASKEGTAISLPHTWNAVDGQDGGNDYHRGTCWYVTKFQKPEFETGSQVYVEFLGASVIADVYLNGEAVAHHEGGYSTFRVNLTDKLQEENVLAVALNNADNNYVYPQKADFTFYGGLYRMVNLIVVPESHFELDYVGGNGIAVTPTVECDENRVPTGKASVKVETWVTGNADSVVITITGEDSESKTVAVVDGHAEATFELEHVHLWDGVDDPYLYHAKAELSSGDVTETTFGCRSFYTDPEKGFVLNGRVYPLRGVSRHQDRAGAGNALSYEMHKEDMEIIKEIGANTIRLAHYQHAQEFYDLCDEYGMVIWAEIPYITMHMPNGRANTLSQMEELVVQNYNHPSIVCWGLSNEITAATPVDEDLLENHRLLNDLCHKL…	No loop
33	0	53717000	81871000	150540000	MYNKIVFSFHLFPRLRIELVKPSNDNLIWNWKGMIGMRQITTLSNGWLFTQMAQEAPPALLPQDWEEVTLPHTWNNLDGQDGGSDYYRGACWYCRALSIPVPADGGRIYLEFQGANSICEVYLNGQKAARHEGGFSTFRADITPYLKADGENLLAVMTDNGSNDTVYPQMADFTFFGGLYRKVSLITVPESHFDLDYYGAPGLRVTPLLKDGAADIALEAYLTNARDGQTLLFEIYDSGDDCIARTQADIHQGTASIRLENPHLWNGVEDPYLYKACAKLLEGGTELDAVCARFGVRTFEVHPDTGFSLNGRPYPLHGVSRHQDRLDKGWAIGEREHEEDMKLIQEVGANTIRLAHYQHDAYFYDLCDEAGMVVWAEIPFISMFLNTPGARENTLQQMR…	No loop
34	0	11659000	20146000	398810000	MIGKGEDIMRTVIELNKNWYFQKENVGLPQELPCDWAKVDLPHTWNAVDGQDGRGEYYRGACWYAKSFETPECMDGYRVYVEVLAAALSGRVYVNGQEVAYHEGGFSTFRADVTEALHAQGENLLVIEVDNGEKSHIYPQVADFTFYGGLYRGVNLILVPEVHFDLDFYGAPGLKVTPVVKGKDAEIKLESWVKNADENYTVRYQIKDADGNVVAESWRPAEQPSVVQFLPDAHLWQGVEDPYLYTCIAELVRRNETVDEVTVRFGIREFYVDKEKGFFLNGKPMKLRGVSRHQDKLYQGNALTKEDHRLDADLIREVGANTIRLAHYQHSQDFYDVCDEYGFVVWAEIPYISSQSDDPAAHENCRQQMKDLIYQNYNHACICFWGISNEITIHGEKPG…	No loop	Firmicutes	Lachnospiraceae	Coprococcus
35	0	52494000	0	0	MREIISLNEGWTLRFPKGERAAETVTLPHTWNAVDGMDGNGSYLRTTGVYSRTFKKPVQPLAGGRVYVEVLAAALDATVKVNGTVATTHEGGFSIFRADITDLCRDGDNELTIEVSNEDTPSMYPASADFTFYGGLYRGVNLISVPNAHFDLDYYGGPGIMVTPKPTADGGATFEIKSFVTNPDDSFTVMYSIEDPYGCEVASAVRPADSTAVTIYVPDAELWSMDEPNLYTVVARLQRNNEAFDEIYANVGVRSYTVTPDGGFSINGEATPLRGVSRHQDKLYKGNALTVEDHYQDAQIIKELGANTIRLAHYQHSQDFYDACDELGFAVWAEIPFISVFKSGKDAHTHVMEEMKELIIQNYNHPSILFWGISNEILIGGISQELVDTHHDLQKLCKE…	No loop	Firmicutes	Ruminococcaceae	Faecalibacterium	Faecalibacterium prausnitzii
36	7848600	0	67557000	219450000	MRQTMNENWKFVKYAENMSEAVGAAGEHVDLPHTWNAADGQDGGNDYYRGICWYVKELGNIVKSGDEEIYLEIPGAAMIGEVYLNGEKLYRHEGGYSLFRVNLTEKLQEKNVIAVSVDNRDNTVCYPQKADFTFYGGLYRGVNLLRVPREHFALDYCGTSGIKVTAETDPETKTARTVVEVWTAGDPKTVTISVTGQADKVVAVTENYAKAIFEMEDIRLWDGLNDPYLYEAKAVLENGETIQARFGCRKFEIDPQKGFLLNGRSYPLRGVSRHQDMAGVGNALTIEDHRRDMEIIREIGANTLRLAHYQHAQEFYDLCDENGLVVWAEIPYITMHMKDGRANTLSQMEELVVQNYNHPCICCWGLSNEITAASAVNEDLLENHRQLNELCHRLDPTRP…	No loop	Firmicutes	Lachnospiraceae
37	63695000	0	0	0	MRNIINLNKDWQFIQKDAGLPTTFPIDWQQVNLPHTWNAVDGHDGNGNYDRGRYWYAKTFATPKQAFGGDRIFVEVLAAGQQATVYVNGTEVTYHEGGYSIFRADITEFCKEEEENLLVIACSNEYKDSVYPQSADFTFYGGLYRGVNIISVPEAHFDLEYYGGPGIQVTPTPCECGGAEFEIVTYTKNVDENFTVLYSICDAEGKEVASACRPADQTNVKIYVPDAKKWEIDAPYLYTVTAQLQRRNESYDEVSVKAGVRSFSCDPNKGFIINGVETPLRGVSRHQDMLYKGNALTREDHYEDARIIKELGANTIRLAHYQHSQDFYDACDEMGFVVWAEIPFISVMNKDPEAHQNCISQLKELIIQNYNHPSICFWGISNEILIGGISEQLVENHKE…	No loop
38	0	0	0	7026900	MRNVINLNKDWAFIQQDVGLPEVMPTDWQTVDLPHTWNAIDGHDGNGSYDKGRYWYAKTFETPKQPLGGGKVFVEFLAAGQQATVYVNGKEVVYHEGGYSTFRADITEVCKEEGENLLVVACSNERKESVYPQSADFTFYGGLYRSVNLISVPDTHFDLEYYGGPGIQVTPKPCECGGATFDIVSYVKEADENFTVLYSICDAEGKEVASACRPADSTAVTMYVPEVTKWEIDTPYLYTVTARLERRNETYDEISARVGVRSFSCDPNKGFIINGVETPLRGVSRHQDQLYKGNALTREDHFEDARIIKELGANTIRLAHYQHSQDFYDACDELGFVVWAEIPFISVMNKDPEAHKNCISQLKELIIQNYNHPSICFWGISNEILIGGISEQLVENHKE…	No loop
39	3120500000	102830000	4768300000	338440000	MRNVINLNKDWAFIQQDVGLPEVMPTDWQTVNLPHTWNAIDGHDGNGSYDKGRYWYAKTFETPKQPLGNGKVFVEFLAAGQQATVYVNGKEVVYHEGGYSTFRADITEVCKEEGENLLVVACSNERKESVYPQSADFTFYGGLYRGVNLISVPDAHFDLEYYGGPGIQVTPKPCDCGGATFDLVSYVKEADENFTVLYSICDAEGKEVASACRPADSTAVTVYVPEVTKWEIDAPYLYTVTARLERRNETYDEISARVGVRSFSCDPNKGFIINGVETPLRGVSRHQDQLYKGNALTREDHFEDARIIKELGANTIRLAHYQHSQDFYDACDELGFVVWAEIPFISVMNKDPEAHQNCISQLKELIIQNYNHPSICFWGISNEILIGGISEQLVENHKE…	No loop	Firmicutes
40	0	0	0	1278400	MRRVINLNNDWAFIQQDAGLPEVMPTDWQTVSLPHTWNAIDGHDGNGGYDKGRYWYAKTFATPKQPLGGGKVFVEFLAAGQQATVYVNGKEVVYHEGGYSTFRADITEVCKEEGENLLVVACSNERKESVYPQSADFTFYGGLYRGVNLISVPDAHFDLEYYGGPGIQVTPKPCDCGGATFDIVSYVKEADENFTVLYSICDAEGKEVASACRPADSTAVTVYVPDVKKWDIDTPYLYTVTARLERRNETYDEISARVGVRSFSCDPNKGFIINGTETPLRGVSRHQDQLYKGNALTREDHFEDAKIIKELGANTIRLAHYQHSQDFYDACDEMGFVVWAEIPFISVMNKDPEAHQNCISQLKELIIQNYNHPSICFWGISNEILIGGISEQLVENHKE…	No loop
41	1627100000	30453000	0	717770000	MGMRNVINLNKDWAFIQQNAGLPEEMPSDWEHVDLPHTWNAVDGHDGNGSYDKGTYWYAKTFETPKQPLGNGKVYVEILAAGQQATVYVNGKEMTYHEGGYSTFRVDITDVCKEEGDNLLVVACSNELKDSVYPQSADFTFYGGLYRGVNLISVPDAHFDLEYYGGPGIQVTSRPCECGGAEFEIVSYVKGADENFTVLYSICDAEGNEVASACRPADETAVKVYVPDATLWEIDAPYLYTVTARLQRRNESYDEISARVGVRSFSCDPNKGFIINGTETPLRGVSRHQDMLYKGNALTKEDHYEDARLIKELGANTIRLAHYQHSQDFYDACDEIGFVVWAEIPFISVMNQDPDAHQNCISQLKELIIQNYNHPSICFWGISNEILIGGISEKLVENH…	No loop	Firmicutes	Lachnospiraceae	Blautia	[Ruminococcus] gnavus
42	63651000	0	0	0	MGMRNVINLNKDWAFIQQNAGLPKEMPSDWEHVDLPHTWNAVDGHDGNGSYDRGTYWYAKTFETPKQPLGNGKVYVEILAAGQQATVYVNGKEMTYHEGGYSTFRVDITDVCNEEGDNLLVIACSNELKDSVYPQSADFTFYGGLYRGVNLISVPDVHFDLEYYGGPGIQVTPRPCECGGAEFEIVSYVKGADENFTVLYSVCDAEGNEVASACRPADETAVKVYVPDATLWEIDAPYLYTVTARLQRRNESYDEISARVGVRSFSCDPNKGFILNGTETPLRGVSRHQDMLYKGNALTKEDHYEDARMIKELGANTIRLAHYQHSQDFYDACDEMGFVVWAEIPFISVMNQDPDAHQNCISQLKELIIQNYNHPSICFWGISNEILIGGISEKLVENH…	No loop	Firmicutes	Lachnospiraceae	Blautia	[Ruminococcus] gnavus
43	0	0	6694100	0	SENCAKNYKNHHCYFSQNLHTIIIQQICEKAKKNGKQRRMVMRNVISLNKNWAFIQENAGLPGEMPTDWHKVDLPHTWNAVDGHDGNGSYDRGTYWYAKTFETPKQPLGGGKVYVEILAAGQQATVYVNGKEVTYHEGGYSTFRADITDVCHEKGDNLLVIACSNEMKDSVYPQSADFTFYGGLYRGVNLISVPDAHFDLEYYGGPGIQVTPKPCECGGAAFEIVSYVKETDENFTVLYAICDAEGNEVASACRPADETTVTVYVPDAKLWEIDAPYLYTVTAKLQRRNETYDEISARVGVRSFSCDPNKGFIINGAETPLRGVSRHQDMLYKGNALTKEDHYEDARLIKELGANTIRLAHYQHSQDFYDACDEMGFVVWAEIPFISVMNQDPDAHQNC…	No loop	Firmicutes	Lachnospiraceae	Blautia	[Ruminococcus] gnavus
44	1310400000	977070000	354870000	260700000	MKHILPINEGWAFVKGCETAPAAIPAGAARVDLPHCWNALDGQDGGSDYWRGPCCYLKTIEKPAGKNVYVEVEAASSVGKIIVNGVEKANHKGGYSLFRANVTDALHDGENLLAIWVDNTQRDDVYPQTADFTFYGGLYRGVNLITVEDSRFDLDYCGGKGFDVSAAVEDGAAVVSLDAFITNPVEGQSVEFIVRDAAGVIVAGAVRPAAERVHAEVRIENAHLWQGVKDPYLYAVEALLTVHNETIDNVSANLGVRTYTVDPQKGFFLNGVLTPLRGVSRHQDRLGQGNALTKEQHEEDVAFIREVGANTVRLAHYQHSPYFYDACDRAGLVVWAEIPFISVMNPAPGAHENCRSQMKELIVQNYNHPSICFWGISNEITIGGERPGLLDNLRDLNAL…	No loop	Firmicutes	Ruminococcaceae	Ruthenibacterium	Ruthenibacterium lactatiformans
45	0	25434000	69019000	352380000	MKEKGGSSMREIININEGWSFSKEQKELPIACEESWEVVDLPHTWNQYDGQDGGSDYYRGACWYVKELGPYTVKPHSRIYLEFQAAANVCAAYVNGKKVCSHEGGFSIFRADITEQLDENGENLIAVCVDNAPKSNVYPQMADFTFYGGLYRDVNLVIVNESHFDLDYYGAPGIKVSSKIQGENALVDIHSYVTNPLEGDRVEFEIYDEDGETKVFAVRPATQETQVAVELLDAHLWQGVEDPYLYTVSARLVRHNEVLDEIETRIGIREYTVDPQKGFFLNGKSMPLRGVSRHQDRYDLGNALTFEEHYEDILLIKEVGANTIRLAHYQHSQDFYDLCDEAGFIIWAEIPFISAMNADPDAHENCRSQMRELIFQNFNHPSICFWGISNEITIGGEVP…	No loop	Firmicutes	Lachnospiraceae	Coprococcus

## Sheet: Loop GUS Abundance Data
Bacterial GUS Abundance (LFQ Intensity)
Loop Category	Female 1	Female 2	Male 1	Male 2		Female 1	Female 2	Male 1	Male 2
Loop 1	3.3304e+06	6.15009e+09	1.9451e+10	8.40126e+08		0.00032302	0.538951	0.633646	0.15845
mini-Loop 1	1.74686e+09	3.66516e+09	7.67411e+08	1.85592e+09		0.16943	0.321189	0.0249996	0.350032
No Loop	8.56003e+09	1.59597e+09	1.04786e+10	2.51508e+09		0.830247	0.13986	0.341355	0.474351
Loop 2	0	0	0	91019000		0	0	0	0.0171665
Total	1.03102e+10	1.14112e+10	3.0697e+10	5.30214e+09
	Female 1	Female 2	Male 1	Male 2
Human GUS Abundance (LFQ Intensity)	4.6537e+08	1.7022e+08	6.2098e+08	3.1615e+08
	Female 1	Female 2	Male 1	Male 2
Total GUS Abundance (LFQ Intensity)	1.07756e+10	1.15814e+10	3.1318e+10	5.61829e+09
